# Supplementary material for: A simple hydrogel scaffold with injectability, adhesivity and osteogenic activity for bone regeneration
Source: Royal Society of Chemistry journal article supplement (doi:10.1039/d0bm01840f), 2020-11-19
Supplement: d0bm01840f1.pdf [file d0bm01840f1.pdf]

## Supporting information for

### A Simple Hydrogel Scaffold with Injectability, Adhesivity and Osteogenic Activity for Bone Regeneration

Hongjie Zhang<sup>1</sup>, Qiuquan Cai<sup>1</sup>, Yanhui Zhu<sup>1</sup>, Weipu Zhu<sup>1,2\*</sup>

<sup>1</sup>MOE Key Laboratory of Macromolecular Synthesis and Functionalization, Department of Polymer Science and Engineering, Zhejiang University, Hangzhou Zhejiang 310027, China

<sup>2</sup>Key Laboratory of Adsorption and Separation Materials & Technologies of Zhejiang Province, Hangzhou, Zhejiang 310027, China

\*Corresponding Author: Weipu Zhu, E-mail: [zhuwp@zju.edu.cn](mailto:zhuwp@zju.edu.cn)

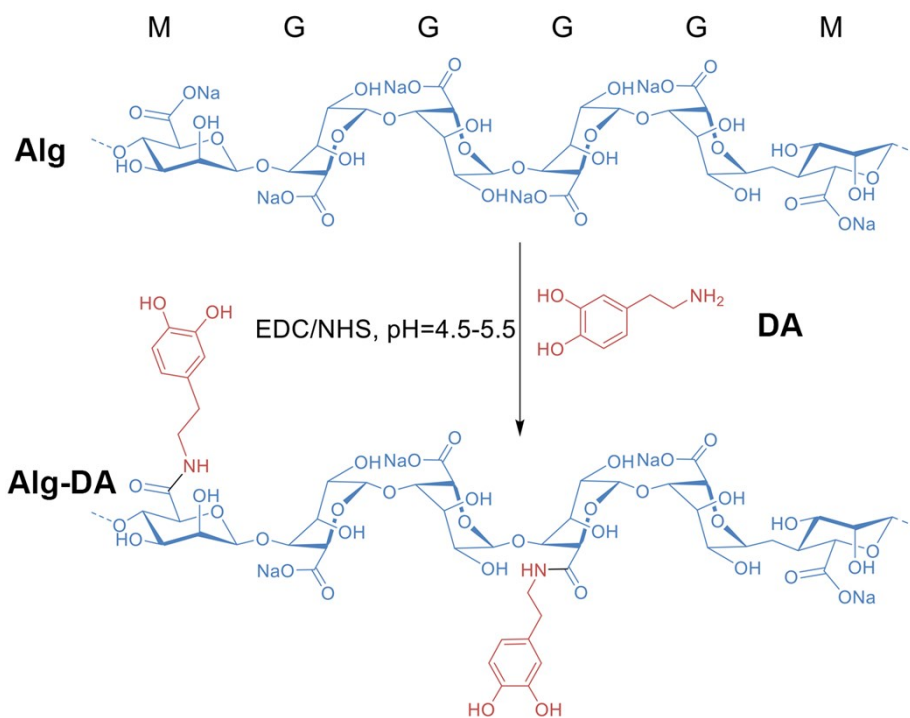

**Figure S1.** Synthesis of Alg-DA conjugates by ligating DA to Alg using EDC/NHS chemistry.

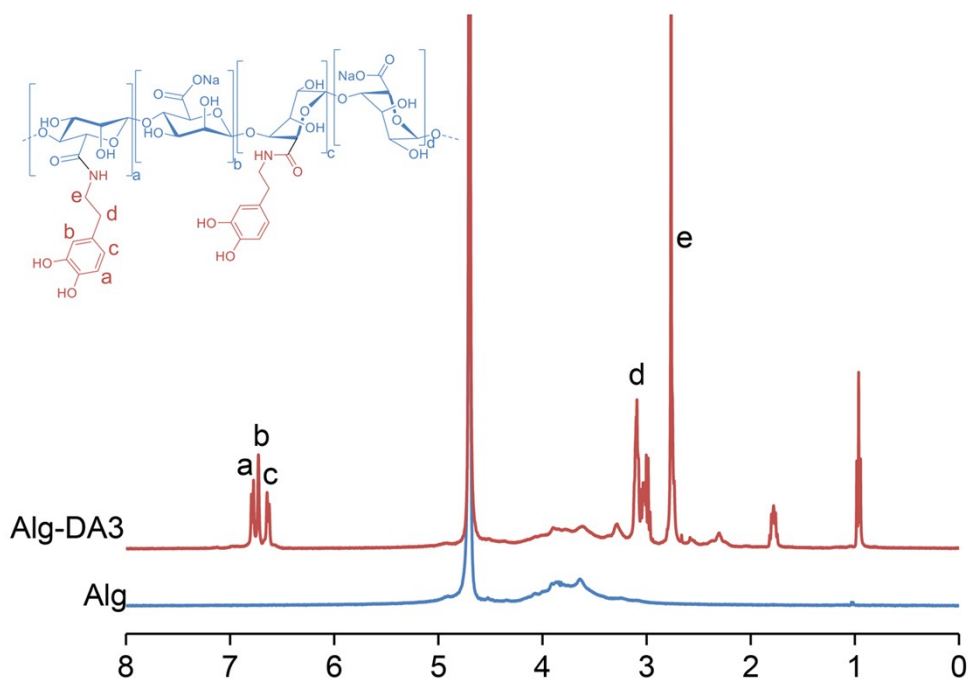

**Figure S2.**  $^1\text{H}$  NMR spectra of Alg and Alg-DA3 in  $\text{D}_2\text{O}$ .

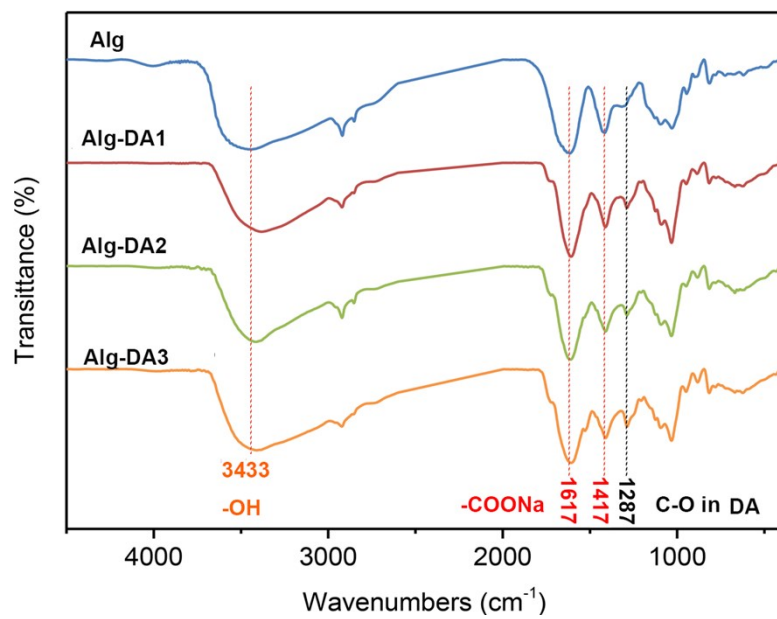

**Figure S3.** FTIR spectra of Alg and Alg-DA conjugates.

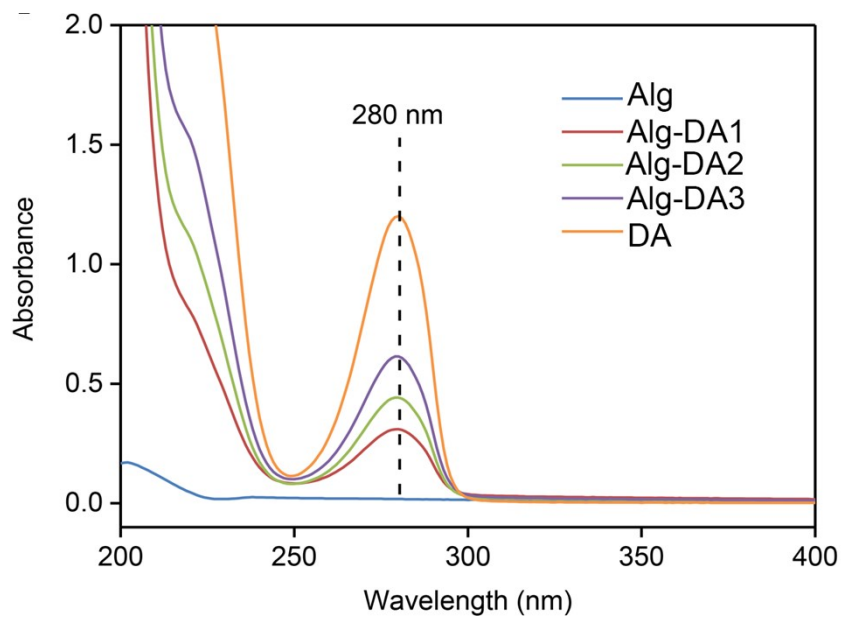

**Figure S4.** UV-vis spectra of Alg, DA and Alg-DA conjugates with different degrees of substitution, the concentration of all samples is 160  $\mu\text{g/L}$ .

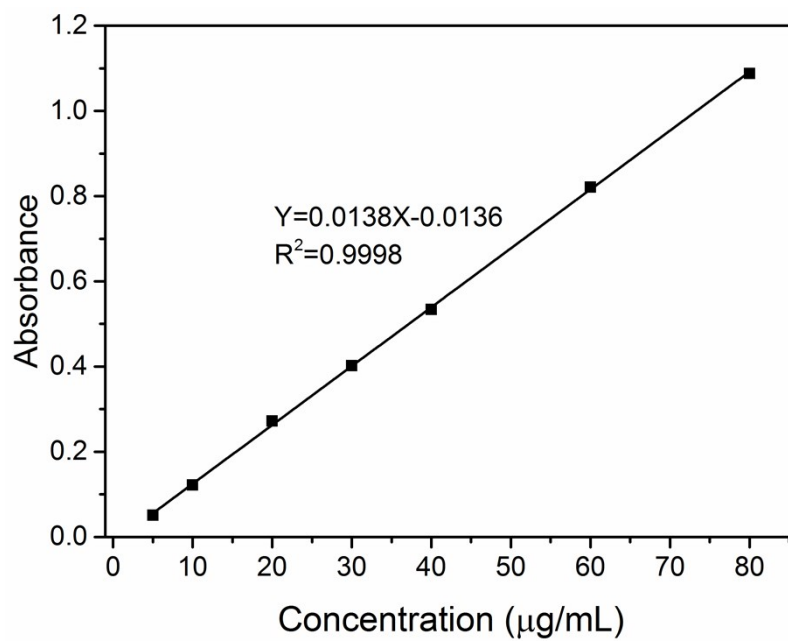

**Figure S5.** The standard curve of DA determined by UV-vis spectra.

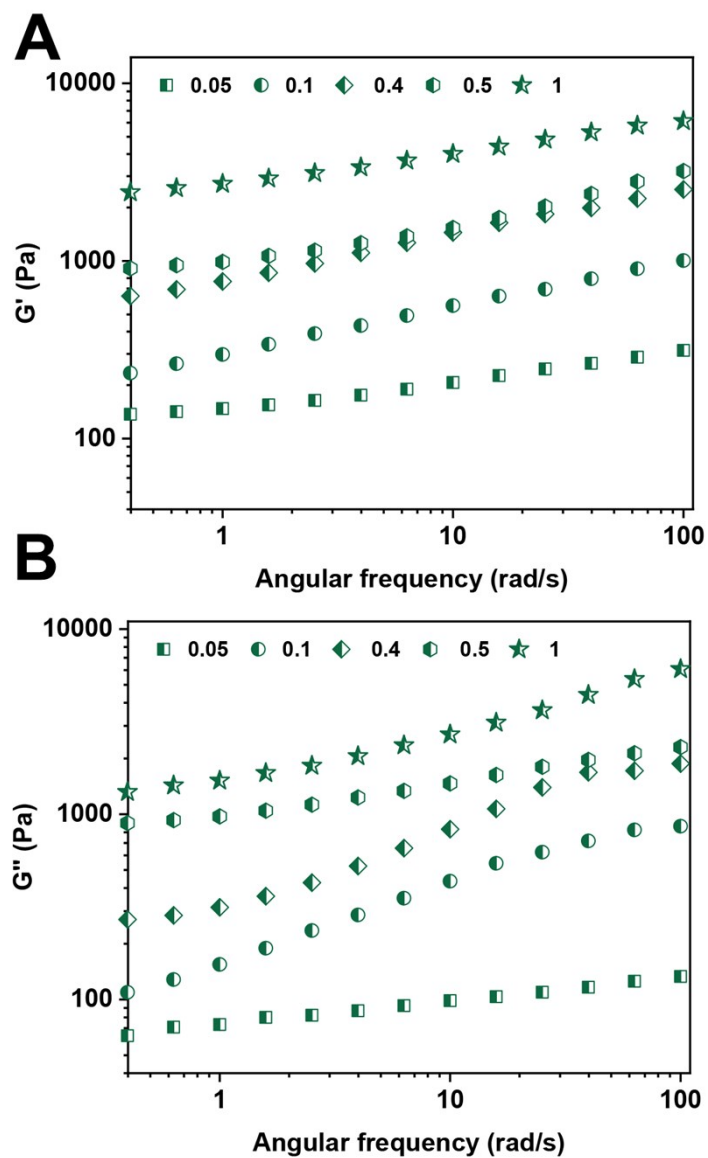

**Figure S6.** The viscoelastic moduli of Alg-DA/Sr<sup>2+</sup> SC hydrogel: (A) The storage modulus; (B) The loss modulus. Dynamic oscillatory frequency sweeps at 0.5% strain with the different molar ratio of [Sr<sup>2+</sup>] to [COONa] in Alg-DA. [Sr<sup>2+</sup>]:[COONa]=0.05, 0.1, 0.4, 0.5, 1, respectively.

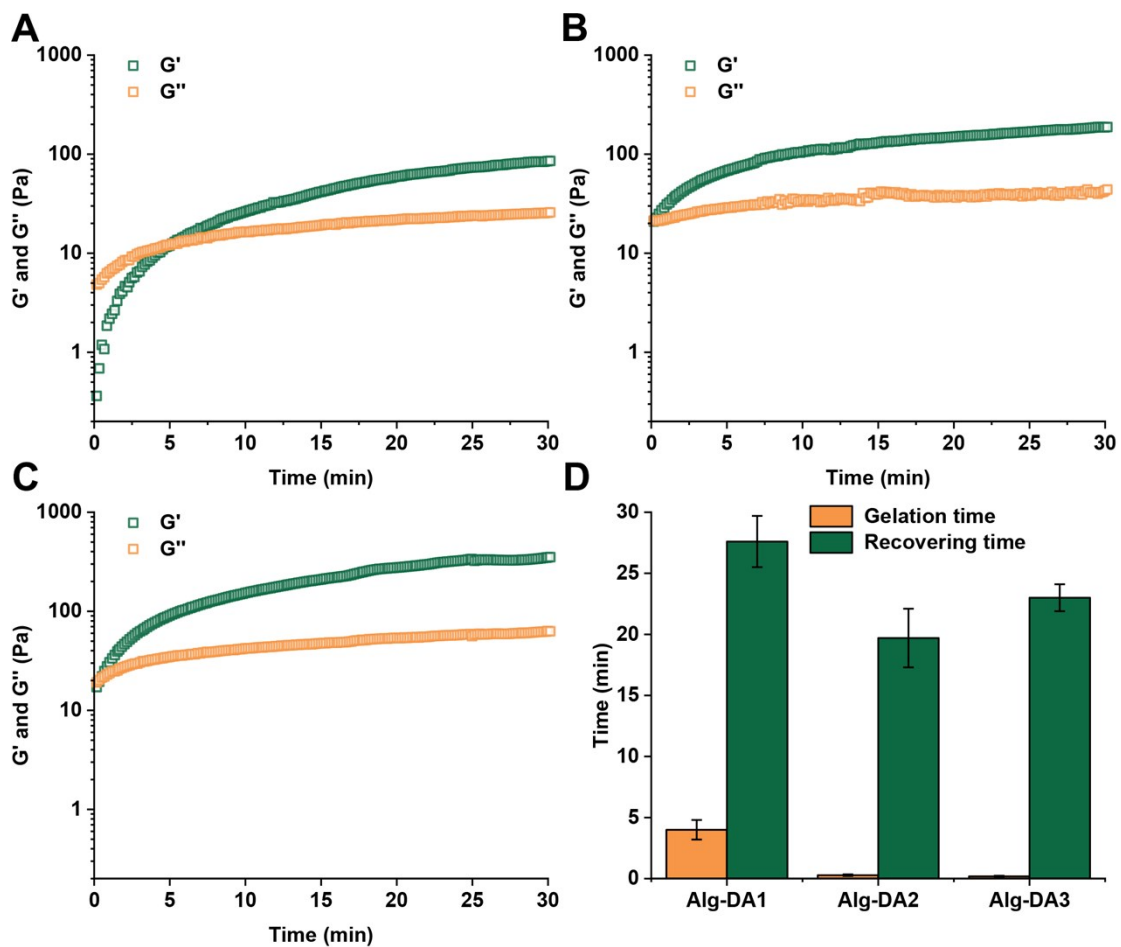

**Figure S7.** Storage modulus ( $G'$ ) and loss modulus ( $G''$ ) of Alg-DA/Sr<sup>2+</sup> SC hydrogel after injecting: (A) Alg-DA1; (B) Alg-DA2; (C) Alg-DA3, (D) Gelation time and recovering time of hydrogels. All measurements were performed at a frequency of 10 rad/s and a strain of 0.5% with  $[Sr^{2+}]/[COONa] = 0.05$ .

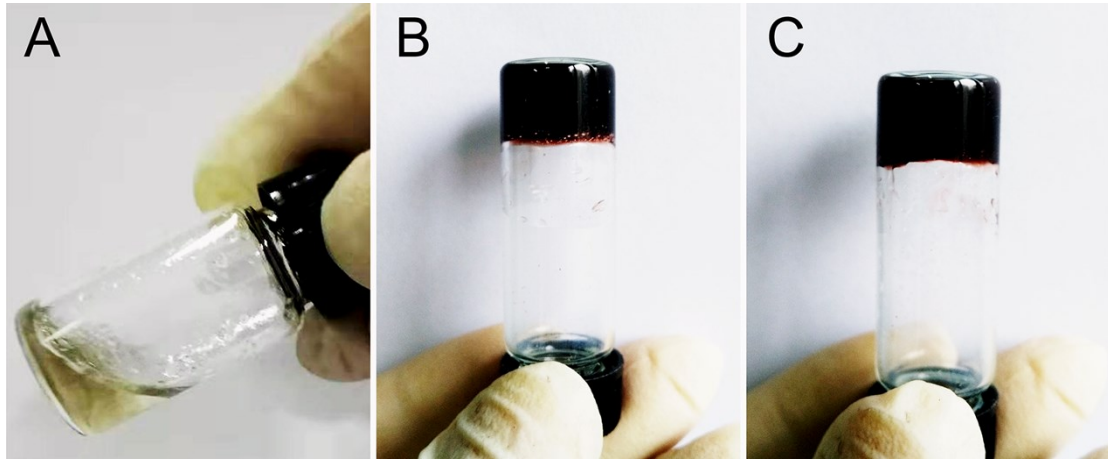

**Figure S8.** (A) Alg-DA solution, (B) Alg-DA SC hydrogel, (C) Alg-DA/Sr<sup>2+</sup> DC hydrogel. [Alg-DA2] = 4 wt%, [Sr<sup>2+</sup>]/[COONa]= 0.05, [HRP] = 25 U/mL, [H<sub>2</sub>O<sub>2</sub>] = 50 mM.



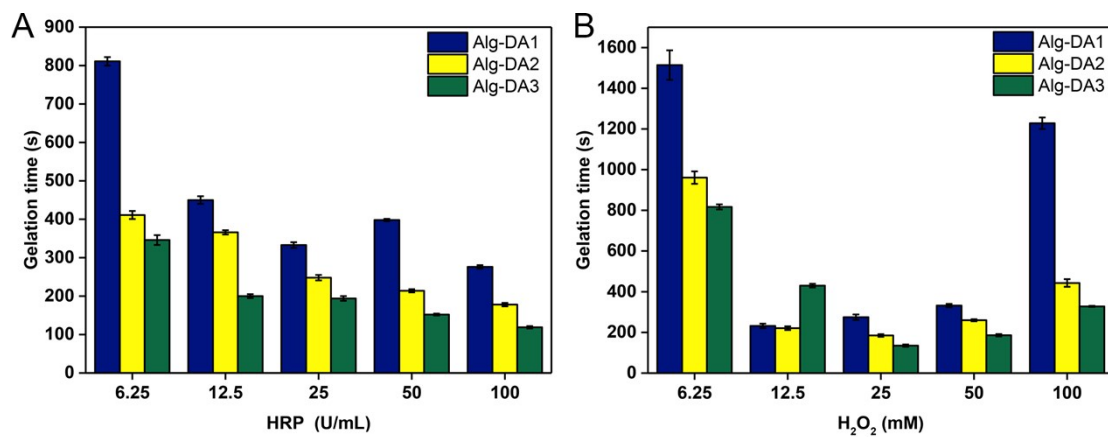

**Figure S9.** (A) Influence of [H<sub>2</sub>O<sub>2</sub>] on gelation time. [Alg-DA] = 4 wt%, [HRP] = 25 U/mL. (B) Influence of [HRP] on gelation time. [Alg-DA] = 4 wt%, [H<sub>2</sub>O<sub>2</sub>] = 50 mM.

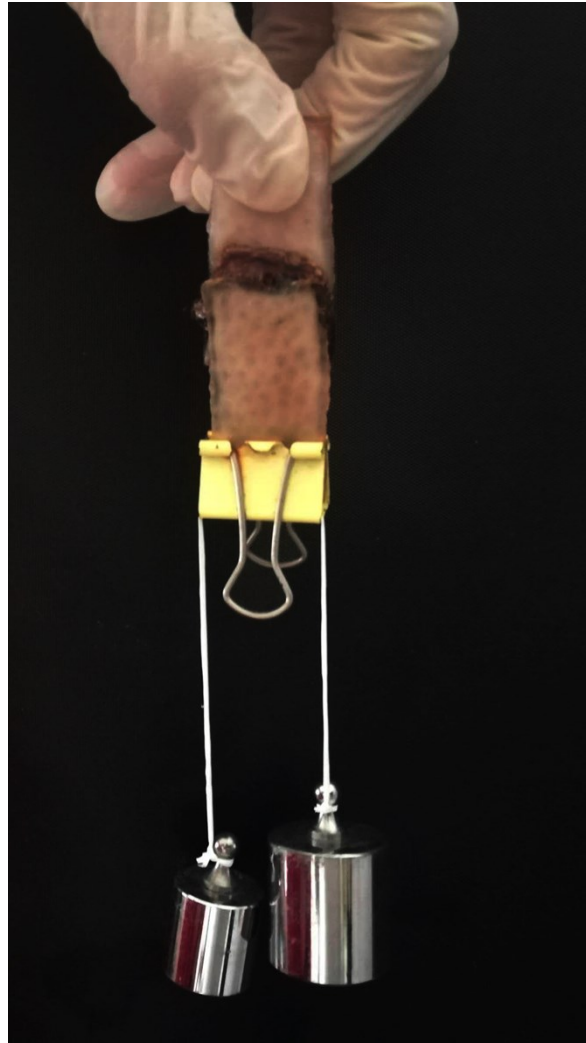

**Figure S10.** Photographic illustration of lap-shear testing using two wet porcine skin tissues bonded with Alg-DA/Sr<sup>2+</sup> DC hydrogel (Contact area: 2.5 cm×2 cm; Weight: 150g; Load: 3 kPa).

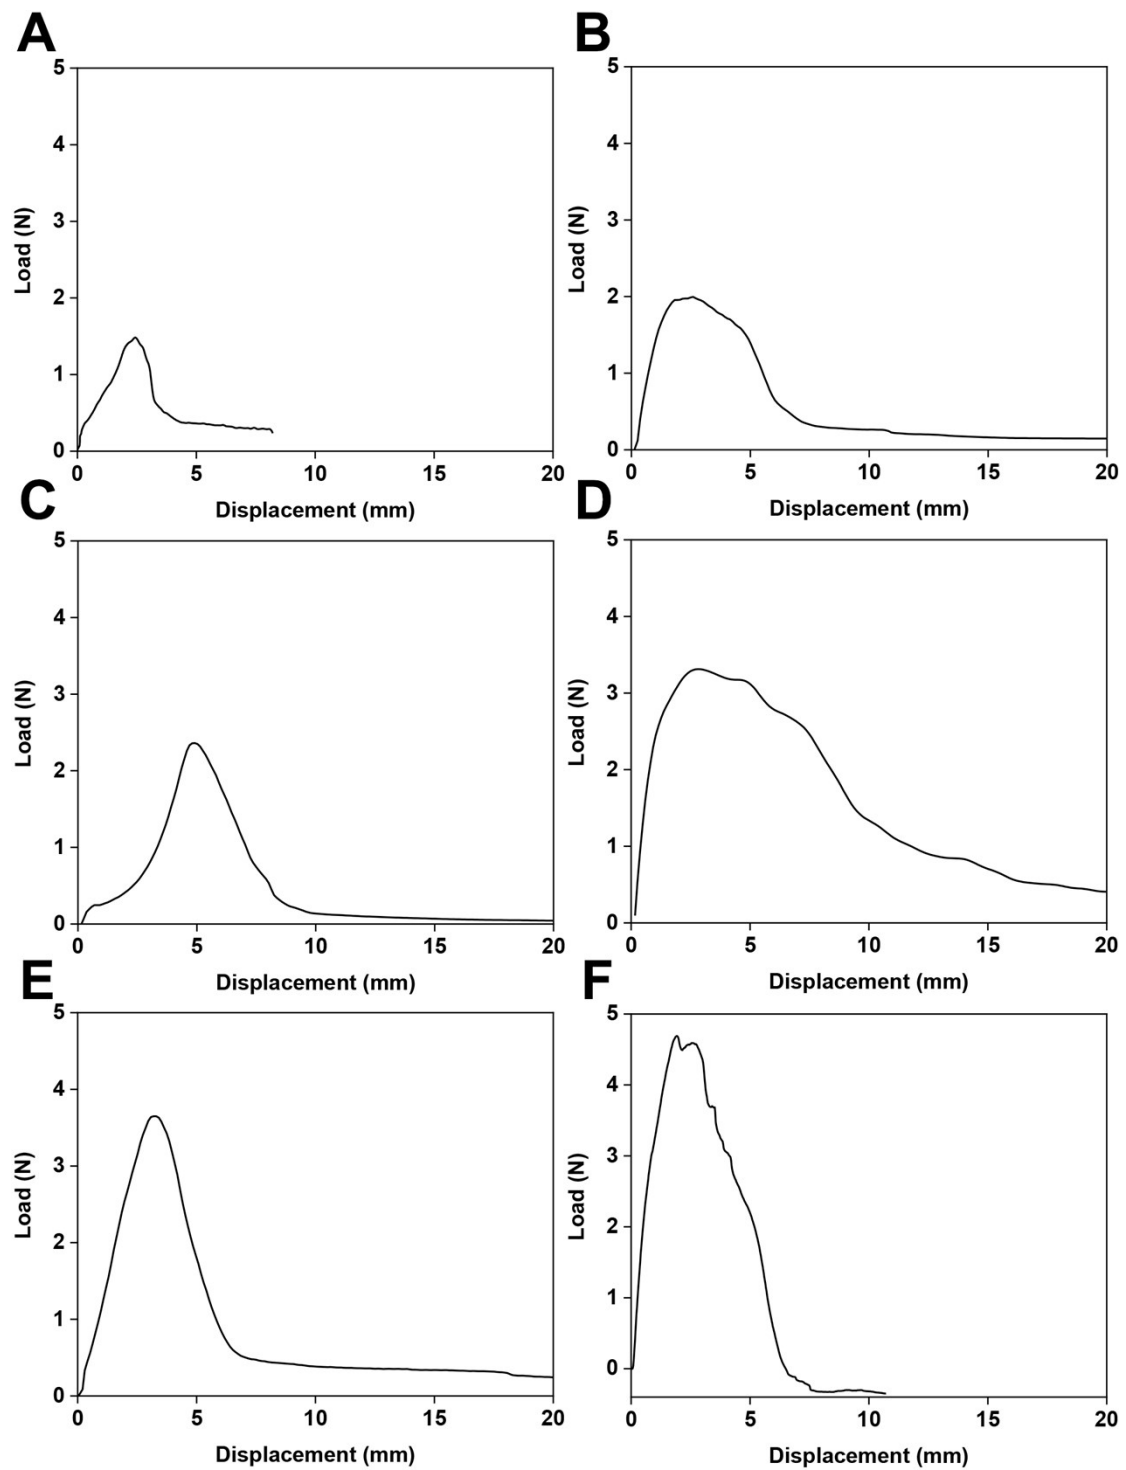

**Figure S11.** Load vs. displacement plot of (A) Alg-DA1 SC hydrogel; (B) Alg-DA1/Sr<sup>2+</sup> DC hydrogel; (C) Alg-DA2 SC hydrogel; (D) Alg-DA2/Sr<sup>2+</sup> DC hydrogel; (E) Alg-DA3 SC hydrogel and (F) Alg-DA3/Sr<sup>2+</sup> DC hydrogel.

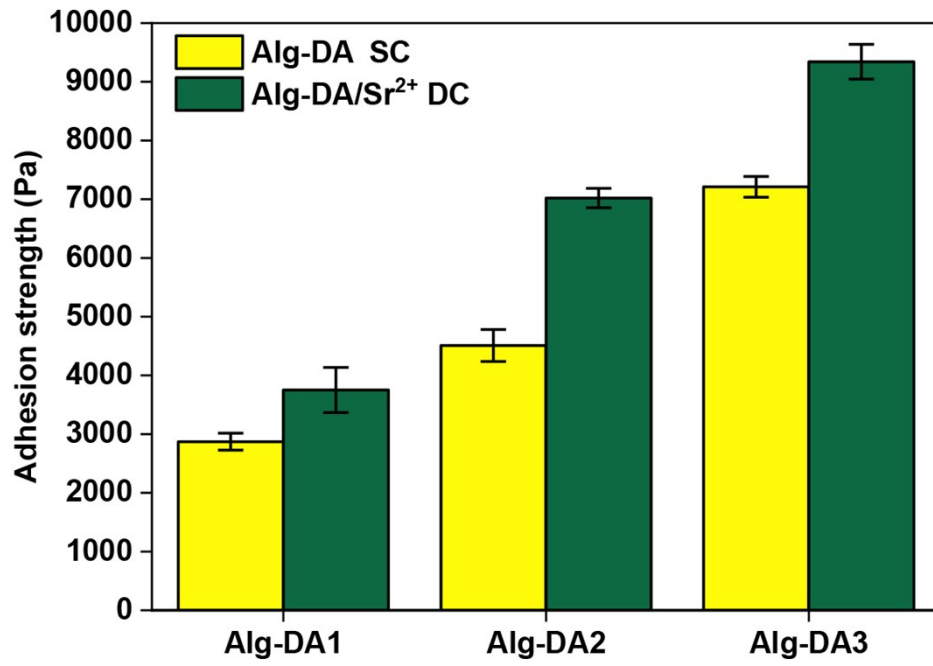

**Figure S12.** Adhesion strength of Alg-DA hydrogels on porcine tissues.

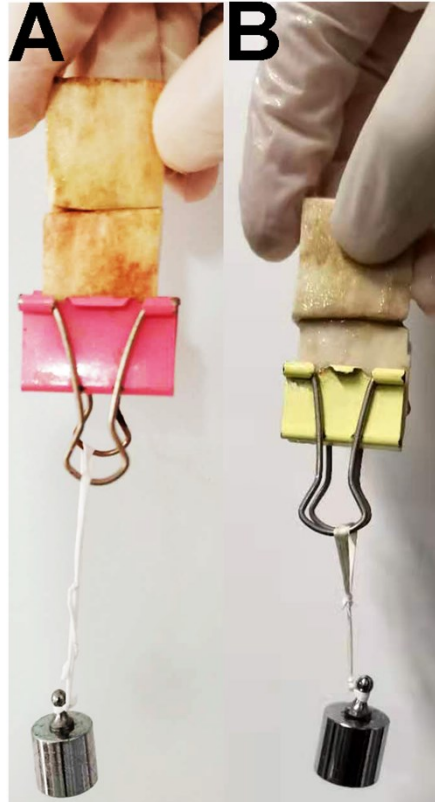

**Figure S13.** Photographic illustration of adhesion strength using two bovine bone tissues bonded with Alg-DA/Sr<sup>2+</sup> DC hydrogel: (A) dry bovine bone tissues (contact area: 2 cm×0.5 cm; weight: 20g; load: 2 kPa); (B) wet bovine bone tissues (soaking the bone tissue in a buffer solution overnight. contact area: 2 cm×0.5 cm; weight: 20g; load: 2 kPa).

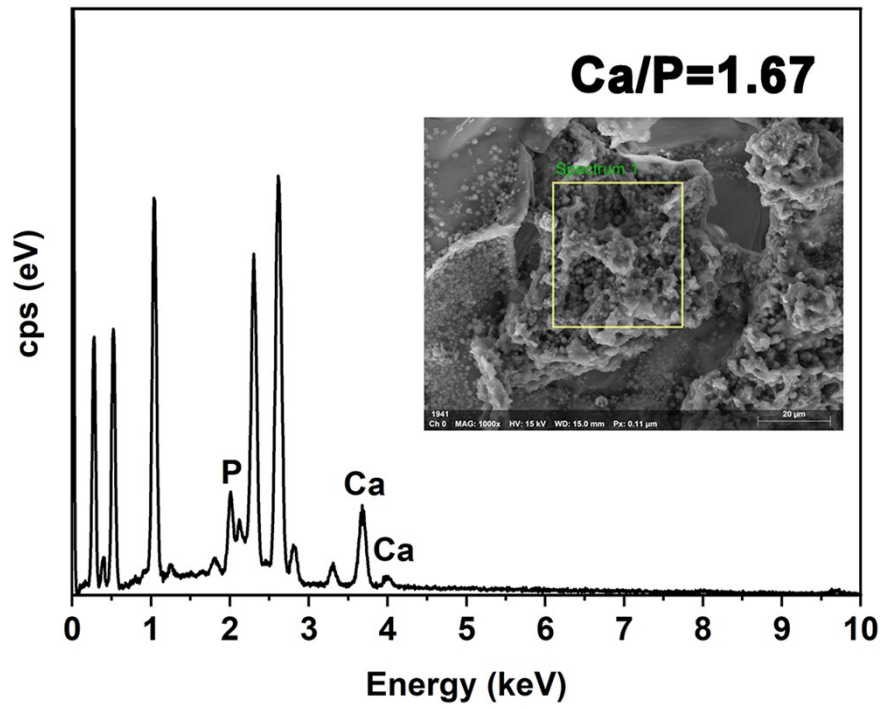

**Figure S14.** EDX spectrum of Alg-DA/Sr<sup>2+</sup> DC hydrogel after being soaked in SBF for 28 days.

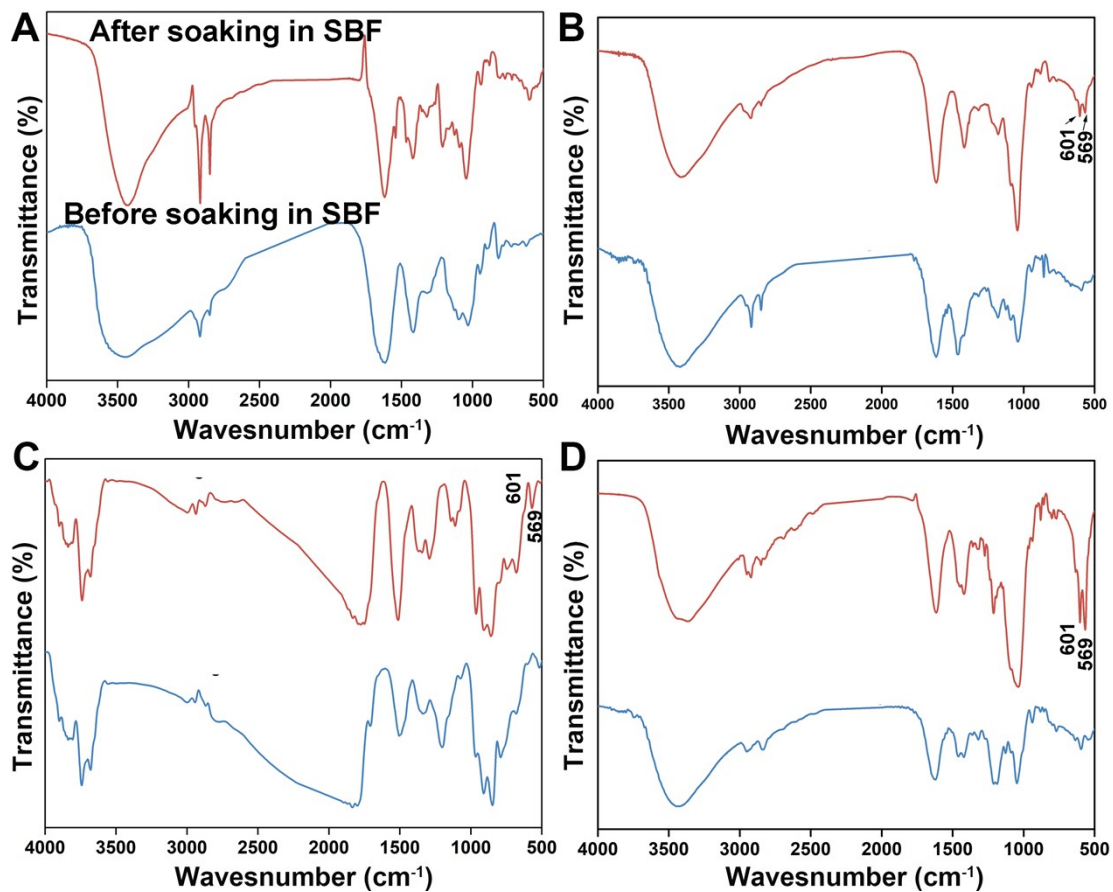

**Figure S15.** The FTIR spectra of hydrogels before and after being soaked in simulated body fluid (SBF) for 28 days. (A) Alg/Sr<sup>2+</sup> SC hydrogel. (B) Alg-DA/Sr<sup>2+</sup> SC hydrogel. (C) Alg-DA SC hydrogel. (D) Alg-DA/Sr<sup>2+</sup> DC hydrogel. Red line: after soaking in SBF; Blue line: before soaking in SBF.

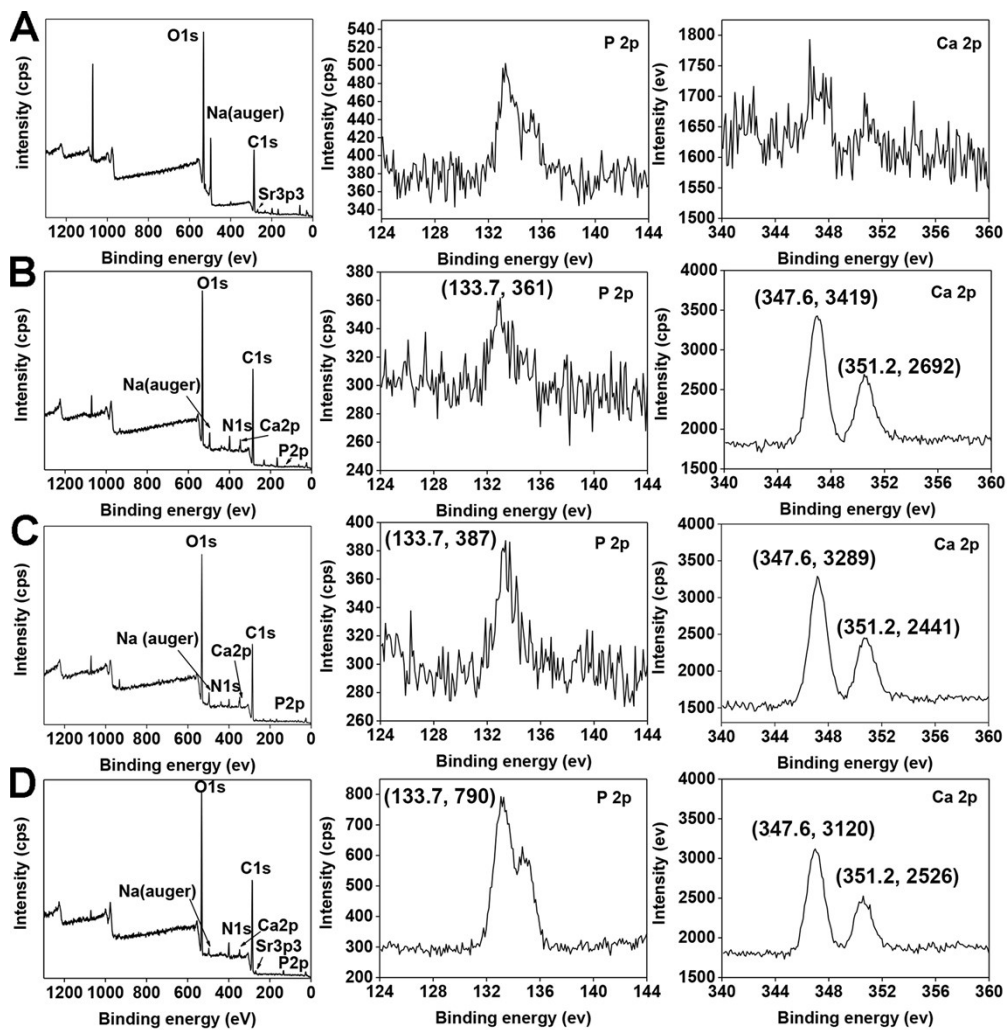

**Figure S16.** XPS spectra and XPS elements spectra of (A) Alg/Sr<sup>2+</sup> SC hydrogel, (B) Alg-DA/Sr<sup>2+</sup> SC hydrogel, (C) Alg-DA SC and (D) Alg-DA/Sr<sup>2+</sup> DC hydrogel after being soaking in SBF for 28 days.



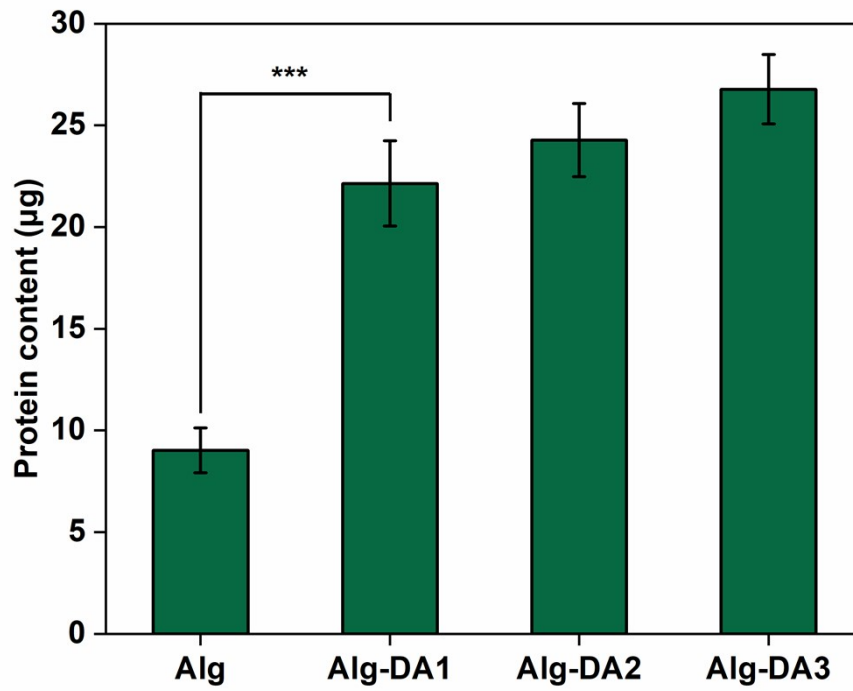

**Figure S17.** Protein adsorption of different hydrogels (Alg/Sr<sup>2+</sup> SC, Alg-DA/Sr<sup>2+</sup> SC).

Mean values  $\pm$  standard deviation. (\*\*\*) $p < 0.001$ ) measured by one-way analysis of variance (ANOVA).

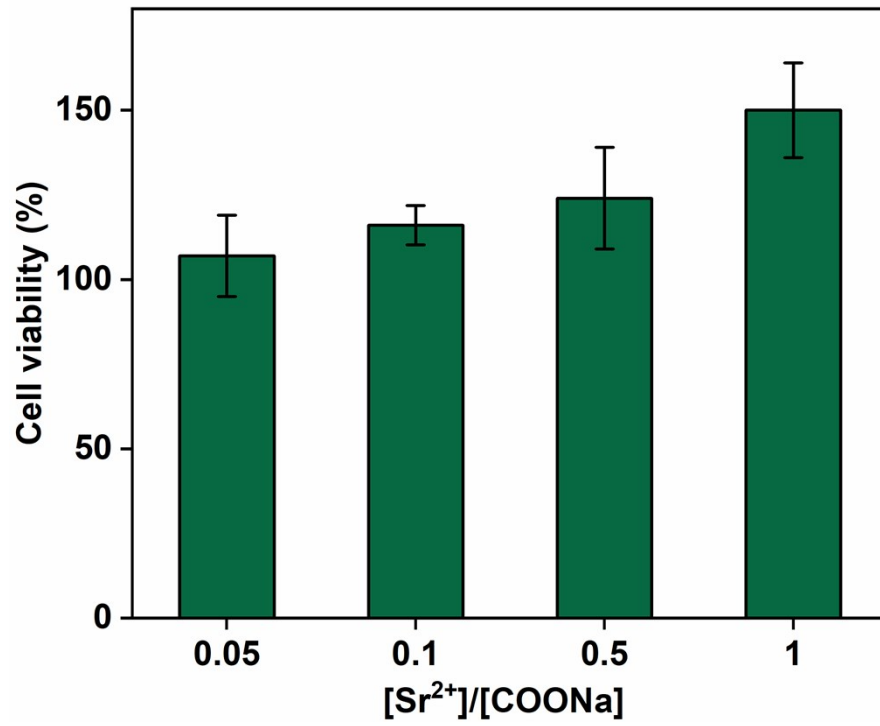

**Figure S18.** Cell viability of Alg-DA/Sr<sup>2+</sup> SC hydrogels with different molar ratio of [Sr<sup>2+</sup>] to [COONa].

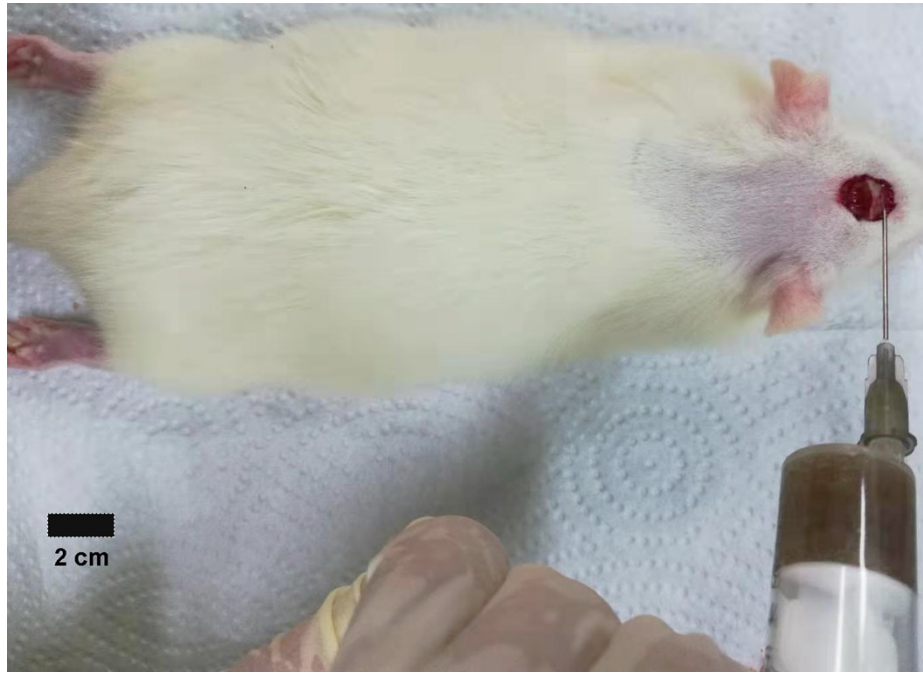

**Figure S19.** Hydrogel was injected to fill defect site.

**Table S1.** Synthesis of Alg-DA conjugates with various degrees of substitution (DS)<sup>a</sup>.

| <b>Sample</b> | <b>Alg : DA<sup>b</sup></b> | <b>DS(%)<sup>c</sup></b> |
|---------------|-----------------------------|--------------------------|
| Alg-DA1       | 2 : 1                       | 18.8                     |
| Alg-DA2       | 1 : 1                       | 28.5                     |
| Alg-DA3       | 1 : 2                       | 45.0                     |

<sup>a</sup>Feeding molar ratio of Alg : EDC : NHS = 1 : 1 : 1. <sup>b</sup>The molar ratio of structural units in sodium alginate to dopamine. <sup>c</sup>Calculation based on UV-vis spectra.
